# Supplementary material
Source: publisher site journal article supplement (https://www.kjim.org/upload/media/kjim-2022-404-Supplementary-Fig-1.pdf)
Supplement: Supplementary file 1 [file kjim-2022-404-Supplementary-Fig-1.pdf]

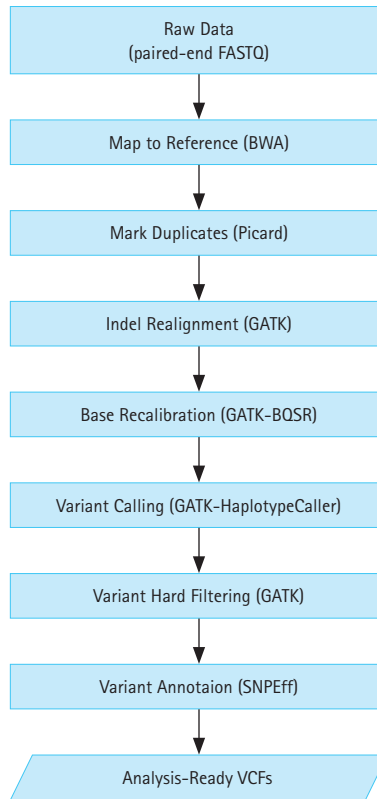

**Supplementary Figure 1.** Whole exome sequencing data processing workflow. BQSR, Base Quality Score Recalibration; GATK, Genome Analysis ToolKit; VCF, variant call format.
